# Supplementary material for: Elevated CSF and plasma complement proteins in genetic frontotemporal dementia: results from the GENFI study
Source: Springer Nature journal article supplement (doi:10.1186/s12974-022-02573-0), 2022-09-05
Supplement: MOESM1 [file 12974_2022_2573_MOESM1_ESM.pdf]

## Additional file 1: Supplementary tables

**Table S1. Number of samples for each of the analytes in CSF and plasma.**

| Analyte       | Samples measured |            | Samples included in statistical analyses |                  |                  |
|---------------|------------------|------------|------------------------------------------|------------------|------------------|
|               | N                | N (CV>20%) | N                                        | N <LLOQ or >ULOQ | Mean %CV (range) |
| <i>CSF</i>    |                  |            |                                          |                  |                  |
| C1q           | 224              | 7          | 217                                      | 0                | 5.3 (0.1-20)     |
| C3b           | 224              | 12         | 212                                      | 0                | 6.6 (0-19)       |
| NfL           | 224              | 0          | 224                                      | 0                | 3.2 (0-16)       |
| <i>Plasma</i> |                  |            |                                          |                  |                  |
| C2            | 427              | 48         | 379                                      | 17               | 6.9 (0-20)       |
| C4b           | 427              | 2          | 425                                      | 0                | 2.6 (0-18)       |
| C5            | 427              | 2          | 425                                      | 0                | 2.8 (0-13)       |
| Factor D      | 427              | 4          | 423                                      | 3                | 2.8 (0-20)       |
| MBL           | 427              | 2          | 425                                      | 1                | 2.1 (0-20)       |
| Factor I      | 427              | 1          | 426                                      | 0                | 2.4 (0-20)       |
| C1q           | 431              | 1          | 430                                      | 3                | 2.2 (0-11)       |
| C3            | 431              | 1          | 430                                      | 1                | 2.6 (0-18)       |
| C4            | 431              | 0          | 431                                      | 0                | 1.7 (0-15)       |
| Factor B      | 431              | 2          | 429                                      | 3                | 2.1 (0-17)       |
| Factor H      | 431              | 0          | 431                                      | 0                | 1.9 (0-13)       |
| NfL           | 276              | 1          | 275                                      | 0                | 4.5 (0-18)       |
| GFAP          | 276              | 0          | 276                                      | 0                | 3.3 (0-20)       |

Samples with a duplicate coefficient of variation (CV) >20% were re-measured or, if materials were insufficient, excluded from statistical analyses. For sample concentrations outside of the range of quantification, we imputed the lower or upper limits of quantification (LLOQ and ULOQ). NfL, neurofilament light chain; MBL, mannose-binding lectin; GFAP, glial fibrillary acidic protein.

**Table S2. Correlations between complement proteins and age.**

|               |       | Entire cohort | Non-carriers |
|---------------|-------|---------------|--------------|
| <i>CSF</i>    |       |               |              |
| C1q           | $r_s$ | 0.359         | 0.188        |
|               | $p$   | <0.001        | 0.115        |
| C3b           | $r_s$ | 0.323         | 0.169        |
|               | $p$   | <0.001        | 0.161        |
| <i>Plasma</i> |       |               |              |
| C2            | $r_s$ | 0.150         | 0.077        |
|               | $p$   | 0.003         | 0.464        |
| C4b           | $r_s$ | 0.177         | 0.183        |
|               | $p$   | <0.001        | 0.058        |
| C5            | $r_s$ | 0.255         | 0.327        |
|               | $p$   | <0.001        | 0.001        |
| Factor D      | $r_s$ | 0.411         | 0.255        |
|               | $p$   | <0.001        | 0.007        |
| MBL           | $r_s$ | -0.057        | 0.000        |
|               | $p$   | 0.244         | 0.999        |
| Factor I      | $r_s$ | 0.215         | 0.389        |
|               | $p$   | <0.001        | <0.001       |
| C1q           | $r_s$ | 0.058         | 0.100        |
|               | $p$   | 0.234         | 0.292        |
| C3            | $r_s$ | -0.064        | -0.223       |
|               | $p$   | 0.188         | 0.018        |
| C4            | $r_s$ | 0.096         | 0.192        |
|               | $p$   | 0.047         | 0.042        |
| Factor B      | $r_s$ | 0.094         | 0.176        |
|               | $p$   | 0.052         | 0.064        |
| Factor H      | $r_s$ | 0.163         | 0.184        |
|               | $p$   | 0.001         | 0.052        |

MBL, mannose-binding lectin.

**Table S3. Correlations between grey matter volume and (a) CSF and (b) plasma complement protein concentration.**

| <i>Supplementary table 3a: CSF complement and grey matter volume</i> |       |        |              |               |               |                |                 |        |
|----------------------------------------------------------------------|-------|--------|--------------|---------------|---------------|----------------|-----------------|--------|
|                                                                      |       | WBV    | Frontal lobe | Temporal lobe | Parietal lobe | Occipital lobe | Cingulate gyrus | Insula |
| <i>Presymptomatic carriers</i>                                       |       |        |              |               |               |                |                 |        |
| C1q                                                                  | $r_s$ | -0.141 | -0.305       | -0.109        | -0.179        | -0.121         | -0.158          | -0.162 |
|                                                                      | $p$   | 0.203  | 0.005*       | 0.328         | 0.106         | 0.275          | 0.153           | 0.143  |
| C3b                                                                  | $r_s$ | -0.143 | -0.295       | -0.043        | -0.123        | -0.067         | -0.225          | -0.182 |
|                                                                      | $p$   | 0.198  | 0.007*       | 0.702         | 0.268         | 0.547          | 0.041           | 0.099  |
| <i>Symptomatic carriers</i>                                          |       |        |              |               |               |                |                 |        |
| C1q                                                                  | $r_s$ | -0.226 | -0.183       | -0.177        | -0.337        | -0.426         | -0.095          | -0.367 |
|                                                                      | $p$   | 0.221  | 0.325        | 0.340         | 0.064         | -0.017         | 0.611           | 0.042  |
| C3b                                                                  | $r_s$ | -0.211 | -0.094       | -0.171        | -0.251        | -0.197         | 0.002           | -0.136 |
|                                                                      | $p$   | 0.263  | 0.623        | 0.367         | 0.181         | 0.296          | 0.990           | 0.472  |

| <i>Supplementary table 3b: Plasma complement and grey matter volume</i> |       |         |              |               |               |                |                 |        |
|-------------------------------------------------------------------------|-------|---------|--------------|---------------|---------------|----------------|-----------------|--------|
|                                                                         |       | WBV     | Frontal lobe | Temporal lobe | Parietal lobe | Occipital lobe | Cingulate gyrus | Insula |
| <i>Presymptomatic carriers</i>                                          |       |         |              |               |               |                |                 |        |
| C2                                                                      | $r_s$ | 0.051   | 0.010        | 0.002         | 0.122         | 0.040          | 0.053           | -0.010 |
|                                                                         | $p$   | 0.496   | 0.892        | 0.980         | 0.106         | 0.592          | 0.484           | 0.896  |
| C4b                                                                     | $r_s$ | -0.073  | -0.046       | -0.166        | -0.044        | -0.080         | -0.005          | -0.131 |
|                                                                         | $p$   | 0.308   | 0.519        | 0.019         | 0.536         | 0.263          | 0.945           | 0.066  |
| C5                                                                      | $r_s$ | -0.174  | -0.101       | -0.241        | -0.161        | -0.173         | -0.040          | -0.113 |
|                                                                         | $p$   | 0.014   | 0.160        | 0.001*        | 0.023         | 0.015          | 0.581           | 0.118  |
| F. D                                                                    | $r_s$ | -0.344  | -0.226       | -0.271        | -0.230        | -0.189         | -0.262          | -0.144 |
|                                                                         | $p$   | <0.001* | 0.001*       | <0.001*       | 0.001*        | 0.008          | <0.001*         | 0.044  |
| MBL                                                                     | $r_s$ | 0.122   | 0.123        | 0.156         | 0.146         | 0.173          | 0.104           | 0.145  |
|                                                                         | $p$   | 0.088   | 0.086        | 0.029         | 0.041         | 0.015          | 0.147           | 0.041  |
| F. I                                                                    | $r_s$ | -0.152  | -0.129       | -0.208        | -0.126        | -0.162         | -0.062          | -0.094 |
|                                                                         | $p$   | 0.032   | 0.070        | 0.003*        | 0.078         | 0.023          | 0.386           | 0.0187 |
| C1q                                                                     | $r_s$ | -0.069  | -0.073       | -0.060        | -0.013        | -0.178         | 0.012           | 0.011  |
|                                                                         | $p$   | 0.334   | 0.303        | 0.400         | 0.069         | 0.012          | 0.866           | 0.872  |
| C3                                                                      | $r_s$ | 0.147   | -0.038       | 0.039         | 0.030         | 0.062          | 0.089           | 0.019  |
|                                                                         | $p$   | 0.038   | 0.592        | 0.582         | 0.671         | 0.384          | 0.212           | 0.789  |
| C4                                                                      | $r_s$ | -0.052  | -0.095       | -0.174        | -0.060        | -0.077         | -0.059          | -0.091 |
|                                                                         | $p$   | 0.465   | 0.183        | 0.014         | 0.402         | 0.282          | 0.407           | 0.198  |
| F. B                                                                    | $r_s$ | -0.090  | -0.123       | -0.175        | -0.086        | -0.153         | -0.024          | -0.065 |
|                                                                         | $p$   | 0.205   | 0.082        | 0.013         | 0.229         | 0.031          | 0.733           | 0.362  |
| F. H                                                                    | $r_s$ | -0.156  | -0.176       | -0.180        | -0.201        | -0.229         | -0.054          | -0.141 |
|                                                                         | $p$   | 0.027   | 0.012*       | 0.011*        | 0.004*        | 0.001*         | 0.447           | 0.046  |
| <i>Symptomatic carriers</i>                                             |       |         |              |               |               |                |                 |        |
| C2                                                                      | $r_s$ | -0.237  | -0.258       | -0.231        | -0.395        | -0.262         | -0.357          | -0.223 |
|                                                                         | $p$   | 0.048   | 0.031        | 0.054         | 0.001*        | 0.028          | 0.002*          | 0.064  |
| C4b                                                                     | $r_s$ | 0.114   | 0.75         | 0.038         | 0.045         | 0.038          | -0.047          | 0.101  |
|                                                                         | $p$   | 0.324   | 0.516        | 0.745         | 0.698         | 0.742          | 0.684           | 0.380  |
| C5                                                                      | $r_s$ | 0.272   | 0.193        | 0.127         | 0.058         | 0.006          | 0.094           | 0.195  |
|                                                                         | $p$   | 0.017   | 0.092        | 0.273         | 0.619         | 0.958          | 0.415           | 0.090  |
| F. D                                                                    | $r_s$ | -0.222  | -0.190       | -0.352        | -0.385        | -0.201         | -0.353          | -0.209 |
|                                                                         | $p$   | 0.052   | 0.098        | 0.002*        | 0.001*        | 0.080          | 0.002*          | 0.068  |
| MBL                                                                     | $r_s$ | -0.051  | -0.067       | 0.040         | -0.125        | -0.152         | -0.105          | -0.068 |

|      |                      |        |        |        |        |        |         |        |
|------|----------------------|--------|--------|--------|--------|--------|---------|--------|
|      | <i>p</i>             | 0.657  | 0.564  | 0.731  | 0.277  | 0.187  | 0.363   | 0.557  |
| F. I | <i>r<sub>s</sub></i> | -0.084 | -0.101 | -0.253 | -0.035 | -0.086 | -0.160  | -0.116 |
|      | <i>p</i>             | 0.469  | 0.381  | 0.026  | 0.764  | 0.459  | 0.163   | 0.315  |
| C1q  | <i>r<sub>s</sub></i> | 0.070  | 0.093  | -0.062 | 0.079  | 0.060  | 0.063   | -0.079 |
|      | <i>p</i>             | 0.564  | 0.423  | 0.595  | 0.498  | 0.607  | 0.587   | 0.500  |
| C3   | <i>r<sub>s</sub></i> | -0.409 | -0.386 | -0.261 | -0.270 | -0.146 | -0.443  | -0.363 |
|      | <i>p</i>             | <0.001 | 0.001* | 0.022* | 0.018  | 0.205  | <0.001* | 0.001* |
| C4   | <i>r<sub>s</sub></i> | 0.133  | 0.049  | 0.036  | 0.107  | 0.144  | -0.018  | 0.050  |
|      | <i>p</i>             | 0.250  | 0.675  | 0.756  | 0.352  | 0.210  | 0.876   | 0.664  |
| F. B | <i>r<sub>s</sub></i> | 0.148  | 0.060  | 0.031  | 0.167  | 0.170  | 0.098   | 0.003  |
|      | <i>p</i>             | 0.198  | 0.607  | 0.786  | 0.147  | 0.138  | 0.398   | 0.982  |
| F. H | <i>r<sub>s</sub></i> | -0.014 | -0.128 | -0.077 | 0.089  | 0.081  | -0.083  | -0.097 |
|      | <i>p</i>             | 0.901  | 0.266  | 0.506  | 0.440  | 0.481  | 0.475   | 0.401  |

All grey matter volumes were corrected for total intracranial volume. \* indicates a result that remained significant after Holm-Bonferroni correction for each of the analytes separately. WBV, whole brain volume; F. D, Factor D; MBL, mannose-binding lectin; F. I, Factor I; F. B, Factor B; F. H, factor H.

**Table S4. Correlations between clinical measures of disease severity and (a) CSF and (b) plasma complement proteins.**

| <i>Supplementary table 4a. CSF complement and clinical disease severity scores</i> |       |        |                                 |
|------------------------------------------------------------------------------------|-------|--------|---------------------------------|
|                                                                                    |       | MMSE   | CDR <sup>®</sup> + NACC FTLD-SB |
| <i>Presymptomatic carriers</i>                                                     |       |        |                                 |
| C1q                                                                                | $r_s$ | -0.370 | 0.229                           |
|                                                                                    | $p$   | 0.013  | 0.233                           |
| C3b                                                                                | $r_s$ | -0.298 | 0.354                           |
|                                                                                    | $p$   | 0.059  | 0.070                           |
| <i>Symptomatic carriers</i>                                                        |       |        |                                 |
| C1q                                                                                | $r_s$ | 0.007  | 0.017                           |
|                                                                                    | $p$   | 0.946  | 0.877                           |
| C3b                                                                                | $r_s$ | 0.027  | 0.065                           |
|                                                                                    | $p$   | 0.794  | 0.543                           |

| <i>Supplementary table 4b. Plasma complement and clinical disease severity scores</i> |       |        |                       |
|---------------------------------------------------------------------------------------|-------|--------|-----------------------|
|                                                                                       |       | MMSE   | CDR plus NACC FTLD-SB |
| <i>Presymptomatic carriers</i>                                                        |       |        |                       |
| C2                                                                                    | $r_s$ | 0.092  | -0.086                |
|                                                                                       | $p$   | 0.212  | 0.291                 |
| C4b                                                                                   | $r_s$ | -0.092 | 0.081                 |
|                                                                                       | $p$   | 0.189  | 0.291                 |
| C5                                                                                    | $r_s$ | -0.102 | 0.017                 |
|                                                                                       | $p$   | 0.144  | 0.823                 |
| Factor D                                                                              | $r_s$ | -0.105 | 0.073                 |
|                                                                                       | $p$   | 0.132  | 0.348                 |
| MBL                                                                                   | $r_s$ | -0.025 | 0.111                 |
|                                                                                       | $p$   | 0.720  | 0.149                 |
| Factor I                                                                              | $r_s$ | -0.033 | 0.049                 |
|                                                                                       | $p$   | 0.638  | 0.523                 |
| C1q                                                                                   | $r_s$ | -0.065 | -0.073                |
|                                                                                       | $p$   | 0.349  | 0.342                 |
| C3                                                                                    | $r_s$ | 0.074  | -0.141                |
|                                                                                       | $p$   | 0.284  | 0.064                 |
| C4                                                                                    | $r_s$ | -0.021 | 0.001                 |
|                                                                                       | $p$   | 0.762  | 0.987                 |
| Factor B                                                                              | $r_s$ | 0.032  | -0.005                |
|                                                                                       | $p$   | 0.600  | 0.947                 |
| Factor H                                                                              | $r_s$ | -0.069 | -0.010                |
|                                                                                       | $p$   | 0.322  | 0.893                 |
| <i>Symptomatic carriers</i>                                                           |       |        |                       |
| C2                                                                                    | $r_s$ | -0.056 | 0.369                 |
|                                                                                       | $p$   | 0.615  | 0.003                 |
| C4b                                                                                   | $r_s$ | 0.112  | 0.045                 |
|                                                                                       | $p$   | 0.291  | 0.707                 |
| C5                                                                                    | $r_s$ | -0.076 | -0.028                |
|                                                                                       | $p$   | 0.473  | 0.818                 |
| Factor D                                                                              | $r_s$ | -0.204 | 0.270                 |
|                                                                                       | $p$   | 0.054  | 0.022                 |
| MBL                                                                                   | $r_s$ | -0.237 | 0.077                 |
|                                                                                       | $p$   | 0.023  | 0.523                 |
| Factor I                                                                              | $r_s$ | -0.094 | 0.193                 |

|          |                      |        |                       |
|----------|----------------------|--------|-----------------------|
|          | <i>p</i>             | 0.374  | 0.104                 |
| C1q      | <i>r<sub>s</sub></i> | -0.188 | 0.175                 |
|          | <i>p</i>             | 0.075  | 0.141                 |
| C3       | <i>r<sub>s</sub></i> | -0.118 | 0.446                 |
|          | <i>p</i>             | 0.266  | <0.001                |
| C4       | <i>r<sub>s</sub></i> | -0.166 | 0.217                 |
|          | <i>p</i>             | 0.117  | 0.067                 |
|          |                      | MMSE   | CDR plus NACC FTLD-SB |
| Factor B | <i>r<sub>s</sub></i> | -0.200 | 0.270                 |
|          | <i>p</i>             | 0.057  | 0.022                 |
| Factor H | <i>r<sub>s</sub></i> | -0.187 | 0.340                 |
|          | <i>p</i>             | 0.076  | 0.003                 |

\* indicates a result that remained significant after Holm-Bonferroni correction. MMSE, Mini Mental State Examination; CDR® + NACC FTLD-SB, Clinical Dementia Rating scale plus NACC Frontotemporal Lobar Degeneration – sum of boxes; F. D, Factor D; MBL, mannose-binding lectin; F. I, Factor I; F. B, Factor B; F. H, factor H.

**Table S5. Correlations between plasma complement factors.**

|     |       | C2     | C4b    | C5     | F.D    | MBL   | F.I    | C1q    | C3    | C4     | F.B    |
|-----|-------|--------|--------|--------|--------|-------|--------|--------|-------|--------|--------|
| C2  | $r_s$ | -      |        |        |        |       |        |        |       |        |        |
|     | $p$   | -      |        |        |        |       |        |        |       |        |        |
| C4b | $r_s$ | 0.276  | -      |        |        |       |        |        |       |        |        |
|     | $p$   | 0.008  | -      |        |        |       |        |        |       |        |        |
| C5  | $r_s$ | 0.077  | 0.593  | -      |        |       |        |        |       |        |        |
|     | $p$   | 0.468  | <0.001 | -      |        |       |        |        |       |        |        |
| F.D | $r_s$ | 0.241  | 0.244  | 0.208  | -      |       |        |        |       |        |        |
|     | $p$   | 0.021  | 0.011  | 0.030  | -      |       |        |        |       |        |        |
| MBL | $r_s$ | 0.247  | -0.040 | 0.047  | 0.270  | -     |        |        |       |        |        |
|     | $p$   | 0.018  | 0.678  | 0.626  | 0.005  | -     |        |        |       |        |        |
| F.I | $r_s$ | 0.326  | 0.349  | 0.560  | 0.440  | 0.126 | -      |        |       |        |        |
|     | $p$   | 0.002  | <0.001 | <0.001 | <0.001 | 0.193 | -      |        |       |        |        |
| C1q | $r_s$ | -0.080 | 0.052  | 0.298  | 0.134  | 0.069 | 0.386  | -      |       |        |        |
|     | $p$   | 0.450  | 0.595  | 0.002  | 0.164  | 0.478 | <0.001 | -      |       |        |        |
| C3  | $r_s$ | 0.383  | 0.044  | -0.122 | -0.041 | 0.048 | 0.078  | 0.224  | -     |        |        |
|     | $p$   | <0.001 | 0.655  | 0.208  | 0.673  | 0.617 | 0.418  | 0.018  | -     |        |        |
| C4  | $r_s$ | 0.090  | 0.269  | 0.450  | 0.222  | 0.019 | 0.622  | 0.495  | 0.213 | -      |        |
|     | $p$   | 0.396  | 0.005  | <0.001 | 0.021  | 0.849 | <0.001 | <0.001 | 0.025 | -      |        |
| F.B | $r_s$ | 0.103  | 0.125  | 0.456  | 0.156  | 0.115 | 0.629  | 0.547  | 0.176 | 0.831  | -      |
|     | $p$   | 0.333  | 0.199  | <0.001 | 0.108  | 0.237 | <0.001 | <0.001 | 0.069 | <0.001 | -      |
| F.H | $r_s$ | -0.004 | 0.181  | 0.544  | 0.170  | 0.005 | 0.539  | 0.618  | 0.182 | 0.777  | 0.744  |
|     | $p$   | 0.971  | 0.061  | <0.001 | 0.078  | 0.960 | <0.001 | <0.001 | 0.056 | <0.001 | <0.001 |

F. D, Factor D; MBL, mannose-binding lectin; F. I, Factor I; F. B, Factor B; F. H, factor H.

**Table S6. Correlations between plasma complement proteins, neurofilament light chain (NfL) and glial fibrillary acidic protein (GFAP).**

|                                |       | NfL     | GFAP   |
|--------------------------------|-------|---------|--------|
| <i>Presymptomatic carriers</i> |       |         |        |
| C2                             | $r_s$ | -0.107  | -0.054 |
|                                | $p$   | 0.254   | 0.560  |
| C4b                            | $r_s$ | 0.223   | 0.221  |
|                                | $p$   | 0.010*  | 0.010* |
| C5                             | $r_s$ | 0.219   | 0.196  |
|                                | $p$   | 0.011   | 0.023* |
| Factor D                       | $r_s$ | 0.326   | 0.197  |
|                                | $p$   | <0.001* | 0.022* |
| MBL                            | $r_s$ | -0.106  | -0.085 |
|                                | $p$   | 0.228   | 0.331  |
| Factor I                       | $r_s$ | -0.031  | 0.046  |
|                                | $p$   | 0.719   | 0.597  |
| C1q                            | $r_s$ | -0.044  | 0.051  |
|                                | $p$   | 0.615   | 0.561  |
| C3                             | $r_s$ | -0.191  | -0.125 |
|                                | $p$   | 0.027   | 0.148  |
| C4                             | $r_s$ | 0.049   | 0.100  |
|                                | $p$   | 0.571   | 0.247  |
| Factor B                       | $r_s$ | 0.030   | 0.123  |
|                                | $p$   | 0.731   | 0.158  |
| Factor H                       | $r_s$ | 0.041   | 0.103  |
|                                | $p$   | 0.638   | 0.234  |
| <i>Symptomatic carriers</i>    |       |         |        |
| C2                             | $r_s$ | -0.236  | -0.123 |
|                                | $p$   | 0.057   | 0.325  |
| C4b                            | $r_s$ | -0.145  | -0.030 |
|                                | $p$   | 0.223   | 0.805  |
| C5                             | $r_s$ | 0.029   | 0.146  |
|                                | $p$   | 0.811   | 0.221  |
| Factor D                       | $r_s$ | 0.010   | 0.179  |
|                                | $p$   | 0.931   | 0.135  |
| MBL                            | $r_s$ | -0.111  | 0.056  |
|                                | $p$   | 0.354   | 0.640  |
| Factor I                       | $r_s$ | -0.174  | -0.002 |
|                                | $p$   | 0.145   | 0.987  |
| C1q                            | $r_s$ | -0.089  | -0.002 |
|                                | $p$   | 0.459   | 0.989  |
| C3                             | $r_s$ | -0.154  | -0.074 |
|                                | $p$   | 0.198   | 0.535  |
| C4                             | $r_s$ | -0.023  | -0.081 |
|                                | $p$   | 0.848   | 0.497  |
| Factor B                       | $r_s$ | 0.046   | -0.008 |
|                                | $p$   | 0.703   | 0.948  |
| Factor H                       | $r_s$ | 0.125   | 0.021  |
|                                | $p$   | 0.295   | 0.859  |

\* indicates a result that remained significant after Holm-Bonferroni correction. MBL, mannose-binding lectin.



**Table S7. Complement protein levels of seven presymptomatic carriers who became symptomatic during follow-up ('converters').**

|   | Genetic subgroup | Time to symptom onset, years | CSF C1q, ng/ml | CSF C3b, ng/ml | Plasma C2, pg/ml | Plasma C3, pg/ml |
|---|------------------|------------------------------|----------------|----------------|------------------|------------------|
| 1 | <i>GRN</i>       | 2.2                          | 113            | 878            | 0.22             | 32.4             |
| 2 | <i>GRN</i>       | -0.4*                        | -              | -              | 0.31             | 29.6             |
| 3 | <i>C9orf72</i>   | 1                            | -              | -              | 0.33             | 196              |
| 4 | <i>GRN</i>       | 0.4                          | -              | -              | 0.61             | 321              |
| 5 | <i>C9orf72</i>   | 1.7                          | -              | -              | -                | 35.6             |
| 6 | <i>C9orf72</i>   | 0.5                          | -              | -              | 0.27             | 22.0             |
| 7 | <i>GRN</i>       | 0.2                          | 374            | 2147           | -                | -                |

Time to symptom onset was based on retrospective estimations by the primary caregiver.\*Symptoms were retrospectively estimated to have begun before the study visit, but at the time, the subject was considered presymptomatic.
